# Supplementary material for: Rationally designed carbon-encapsulated manganese selenide composites from metal–organic frameworks for stable aqueous Zn–Mn batteries
Source: Royal Society of Chemistry journal article supplement (doi:10.1039/d3ta08043a), 2024-01-01
Supplement: d3ta08043a1.pdf [file d3ta08043a1.pdf]

## Supporting Information

### **Rationally designed carbon-encapsulated manganese selenides composites from metal-organic frameworks for stable aqueous aqueous Zn-Mn batteries**

*Bin Wang<sup>1</sup>, Wenqi Li<sup>1</sup>, Siyuan Wang<sup>1</sup>, Peng Xie<sup>1</sup>, Peng Wan<sup>1</sup>, Ying Gui<sup>1</sup>, Ding Chen<sup>1\*</sup>*

*<sup>1</sup>State Key Laboratory of Advanced Design and Manufacturing for Vehicle Body,  
College of Mechanical and Vehicle Engineering, Hunan University, 410082  
Changsha, China*

\*Corresponding author: [chending@hnu.edu.cn](mailto:chending@hnu.edu.cn) (D. Chen)

## S1. CALCULATION EQUATIONS

During the electrochemical kinetic analysis-based CV curves, the peak current ( $i$ ) and scan rate ( $v$ ) can be obeyed with Equations. 1-2<sup>1, 2</sup>:

$$i = av^b \quad 1$$

$$\log(i) = b \log(v) + \log(a) \quad 2$$

where  $a$  and  $b$  are the fitted parameters. The current  $i(V)$  at a given potential  $V$  obey the relations of<sup>3</sup>

$$i(V) = k_1v + k_2v^{1/2} \quad 3$$

and

$$i(V)/v^{1/2} = k_1/v^{1/2} + k_2 \quad 4$$

Where  $i(V)$ ,  $k_1v$ , and  $k_2v^{1/2}$  correspond to the measured current, current from the surface capacitive contribution, and current from diffusion-controlled  $Zn^{2+}$  intercalation contribution, respectively.

The ions diffusion coefficient can be well calculated from the low-frequency plots using the following equation (5):

$$D = \frac{R^2T^2}{2A^2n^4F^4C^2\sigma^2} \quad 5$$

where  $R$  is the gas constant,  $T$  is the absolute temperature,  $A$  is the surface area of electrode,  $n$  is the number of electrons per molecule during oxidization,  $F$  is the Faraday constant,  $C$  is the concentration of ion, and  $\sigma$  is the Warburg factor, where the Warburg factor is related to  $Z'$  derived by the following equation (6)<sup>4</sup>:

$$Z' = R_s + R_{ct} + \sigma\omega^{-1/2} \quad 6$$

Where  $\omega$  is the angular frequency in the region,  $R_s$  is the ohmic resistance,  $R_{ct}$  is the charge-transfer resistance.

The ions diffusion coefficients were also measured by Galvanostatic Intermittent Titration Technique (GITT) and calculated based on the equation (7) below<sup>5</sup>:

$$D_{GIT} = \frac{4}{\pi\tau} \left( \frac{m_B V_m}{M_B S} \right)^2 \left( \frac{\Delta E_s}{\Delta E_\tau} \right)^2 \quad 7$$

Where  $m_B$  (g) is the weight of the active materials,  $M_B$  (g mol<sup>-1</sup>) is the molecular weight,  $V_m$  (cm<sup>3</sup> mol<sup>-1</sup>) is its molar volume,  $S$  (cm<sup>2</sup>) is the surface area,  $\tau$  (s) is duration time of the current pulse,  $\Delta E_s$  is the voltage difference measured at the end of the relaxation period for two successive steps,  $\Delta E_\tau$  is the difference between the initial voltage and final voltage during the discharge pulse time  $\tau$  after eliminating the  $iR$  drop. It is also calculated  $D_{GIT}$  by equation (8) as follows<sup>6</sup>:

$$D_{GIT} = \frac{4L^2}{\pi\tau} \left( \frac{\Delta E_s}{\Delta E_\tau} \right)^2 \quad 8$$

$L$  is ion diffusion length (cm), for compact electrode, it is equal to the thickness of cathode material.

## S2. Results

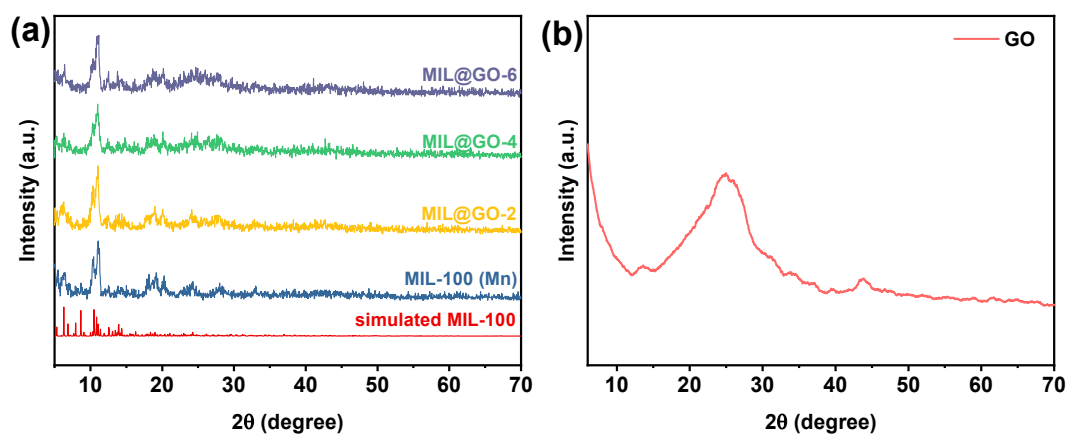

**Figure S1.** XRD spectrum for (a) MIL-100, MIL-GO-*x* and (b) GO.

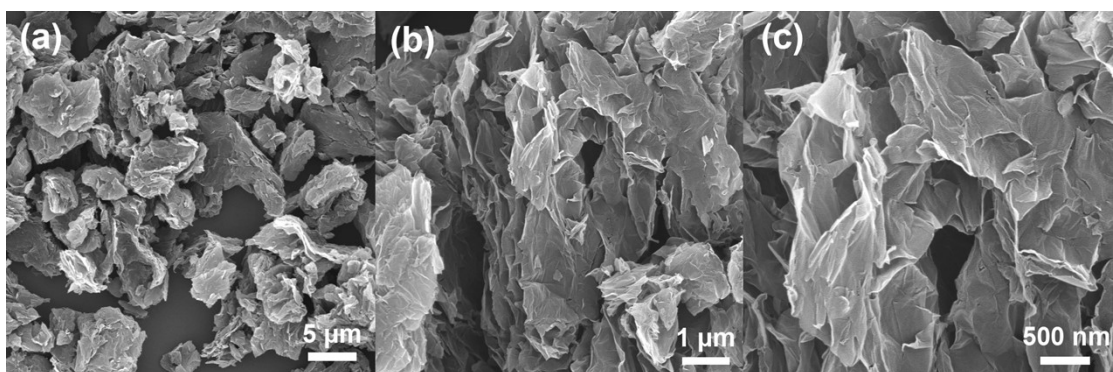

**Figure S2.** SEM images with different magnifications of GO, respectively. (a) 5 μm, (b) 1 μm, (c) 500 nm.

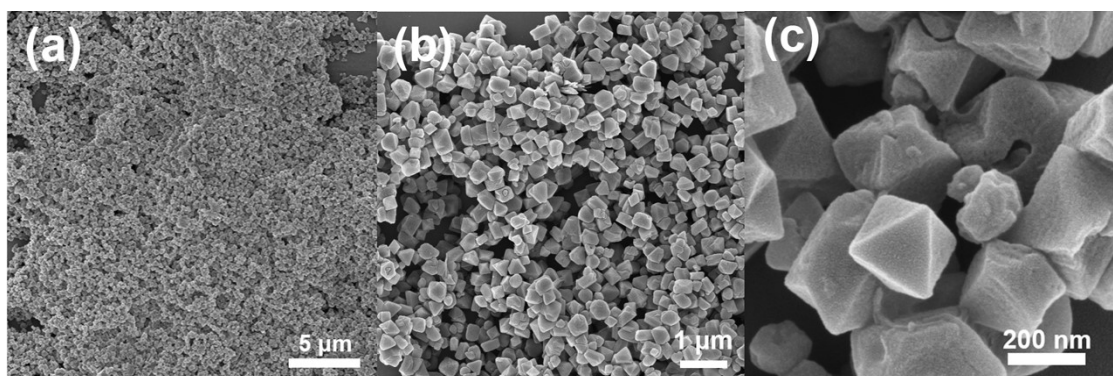

**Figure S3.** SEM images with different magnifications of MIL-100, respectively. (a) 5 μm, (b) 1 μm, (c) 200 nm.

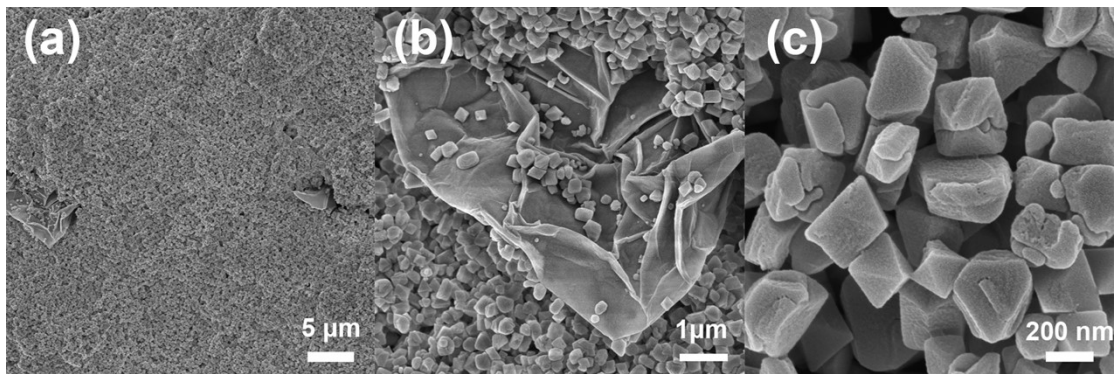

**Figure S4.** SEM images with different magnifications of MIL@GO-2, respectively. (a) 5 μm, (b) 1 μm, (c) 200 nm.

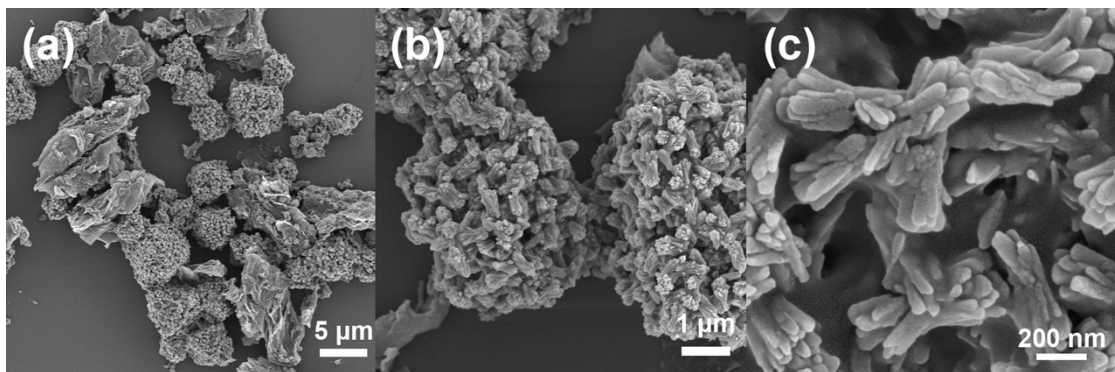

**Figure S5.** SEM images with different magnifications of MIL@GO-4, respectively. (a) 5 μm, (b) 1 μm, (c) 200 nm.

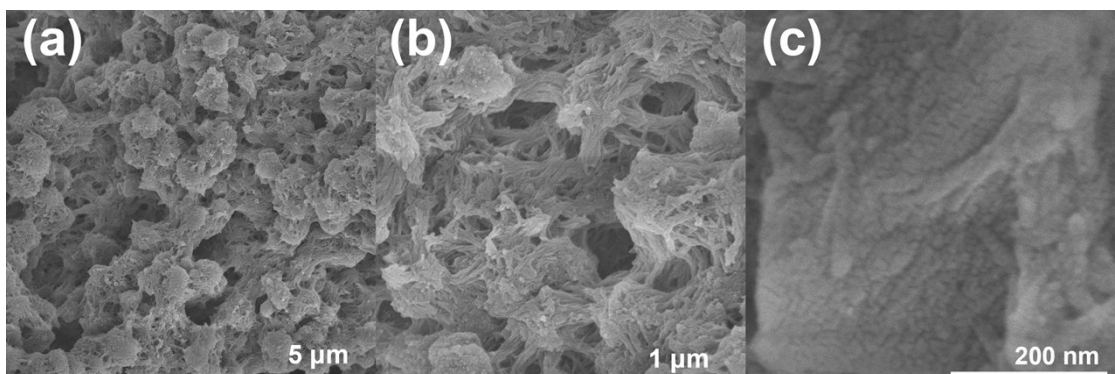

**Figure S6.** SEM images with different magnifications of MIL@GO-6, respectively. (a) 5 μm, (b) 1 μm, (c) 200 nm.

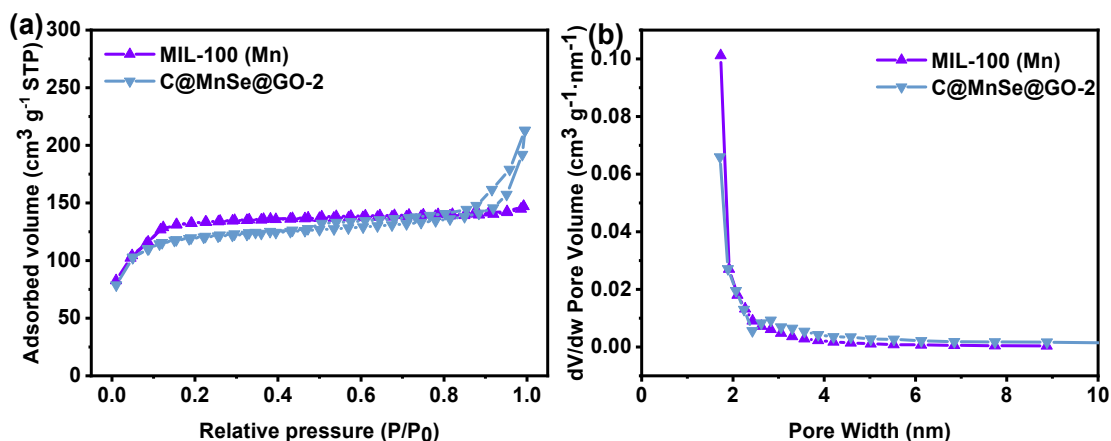

**Figure S7.** (a)  $N_2$  adsorption-desorption isotherms and (b) pore size distributions of MIL-100 and C@MnSe@GO-2.

Figure S7 shows the  $N_2$  adsorption and desorption curves of MIL-100 and C@MnSe@GO-2 and the corresponding pore size distributions. It can be seen in Figure S7a that all curves exhibit H3-type with hysteresis loops. MIL-100 exhibits a large specific surface area of about  $500.86 \text{ m}^2 \text{ g}^{-1}$ , whereas the specific surface area of C@MnSe@GO-2 decreases slightly from  $500.86 \text{ m}^2 \text{ g}^{-1}$  to  $453.12 \text{ m}^2 \text{ g}^{-1}$  after the introduction of GO. However, owing to the high-temperature gas-phase selenization process, a carbon coating is formed on the surface of C@MnSe@GO-2. This carbon coating serves to increase the material's pore volume and pore size, providing additional reactive sites for zinc ions. As a result, the enhanced porosity contributes to the improved reactivity and facilitates a higher capacity for zinc ion reactions.

**Table S1.** The porous structure for MIL-100 and C@MnSe@GO-2.

| Samples   | $S_{\text{BET}}$ ( $\text{m}^2 \text{ g}^{-1}$ ) | $V_{\text{total}}$ ( $\text{cm}^3 \text{ g}^{-1}$ ) | Average pore size (nm) |
|-----------|--------------------------------------------------|-----------------------------------------------------|------------------------|
| MIL-100   | 500.86                                           | 0.23                                                | 1.82                   |
| MnSe@GO-2 | 453.12                                           | 0.33                                                | 2.90                   |

$S_{\text{BET}}$ : BET surface area,  $V_{\text{total}}$ : total pore volume calculated by density functional theory (DFT) method.

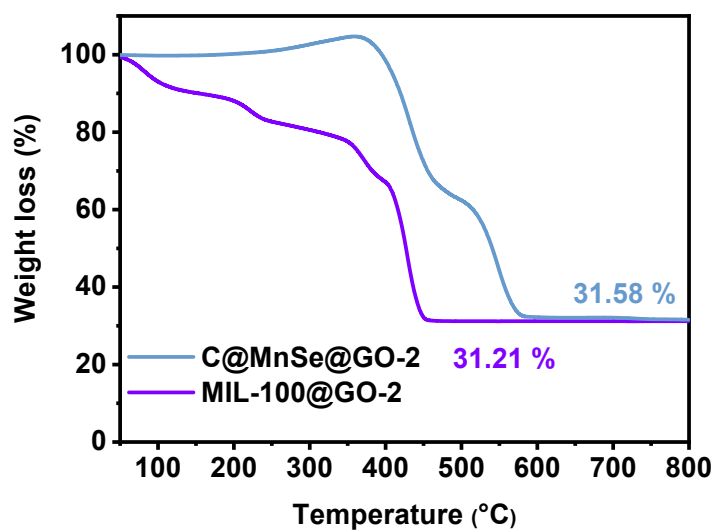

**Figure S8.** TGA curve of the C@MnSe@GO-2 and MIL-100@GO-2.



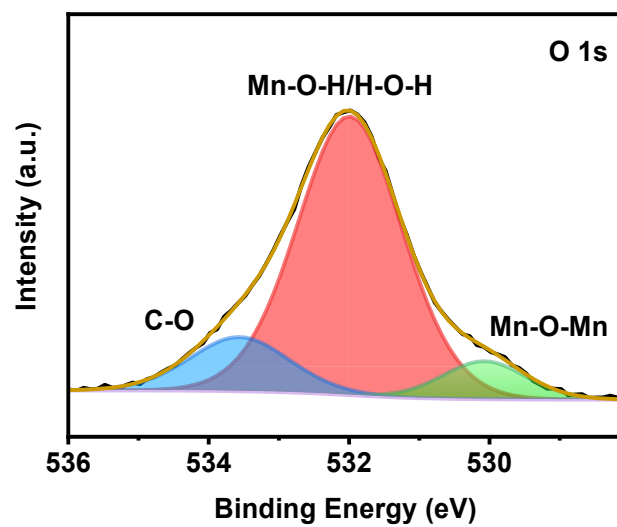

**Figure S9.** the O 1s high-resolution spectra of C@MnSe@GO-2

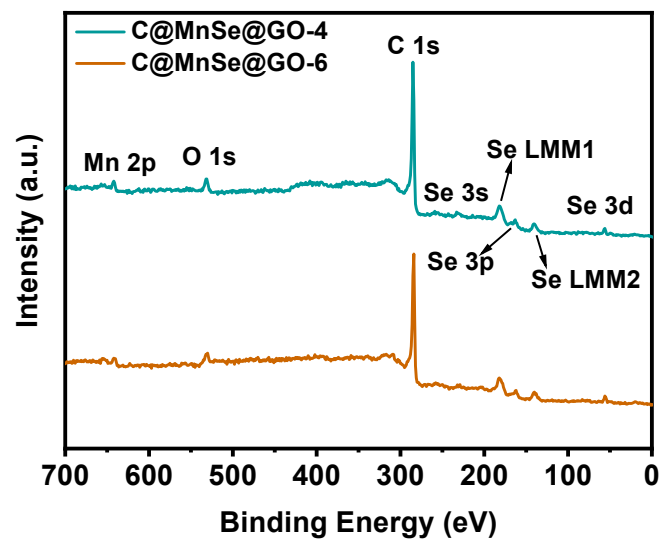

**Figure S10.** survey XPS spectrum of C@MnSe@GO-4 and C@MnSe@GO-6.

**Table S2.** The chemical compositions and contents of the C@MnSe@GO-*x* from XPS analysis.

| Samples                    | C (at%) | Se (at%) | O (at%) | Mn (at%) |
|----------------------------|---------|----------|---------|----------|
| <b>Binding energy (eV)</b> | ~284    | ~54      | ~532    | ~641/653 |
| C@MnSe@GO-2                | 61.87   | 6.29     | 26.97   | 4.87     |
| C@MnSe@GO-4                | 90.16   | 6.49     | 2.14    | 1.21     |
| C@MnSe@GO-6                | 90.37   | 6.33     | 2.11    | 1.19     |

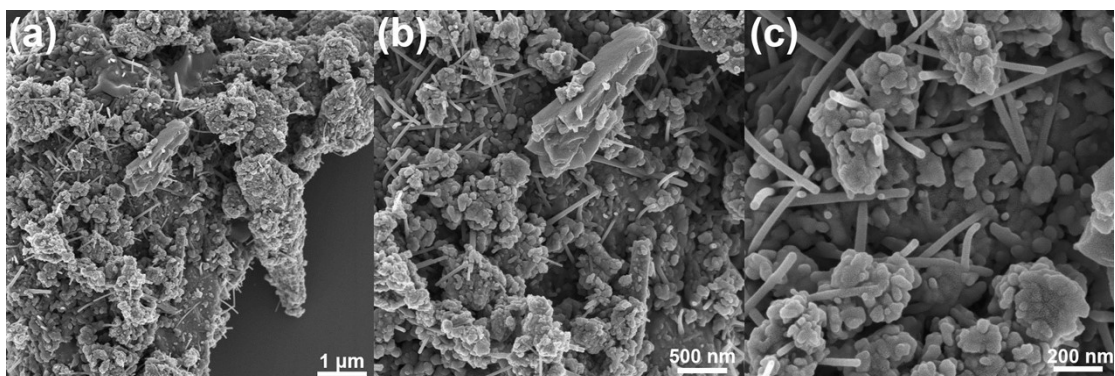

**Figure S11.** SEM images with different magnifications of Bulk MnO<sub>2</sub>, respectively. (a) 1 μm, (b) 500 nm, (c) 200 nm.

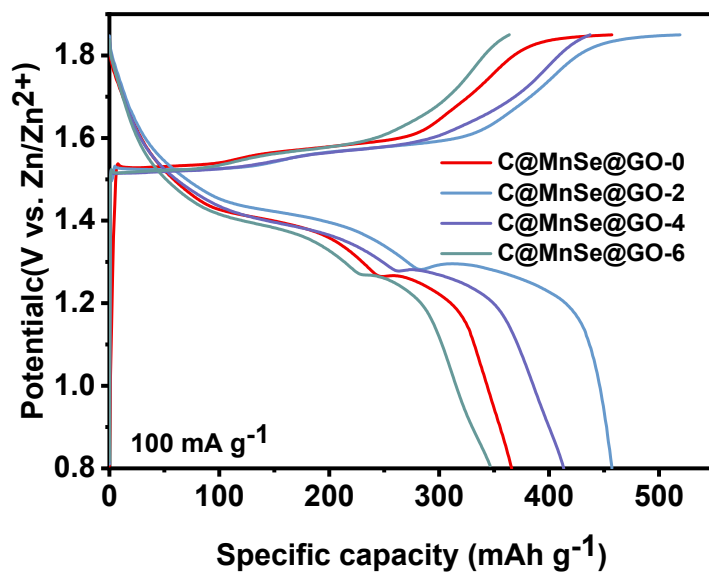

**Figure S12.** The galvanostatic charge-discharge curves for C@MnSe@GO-x.

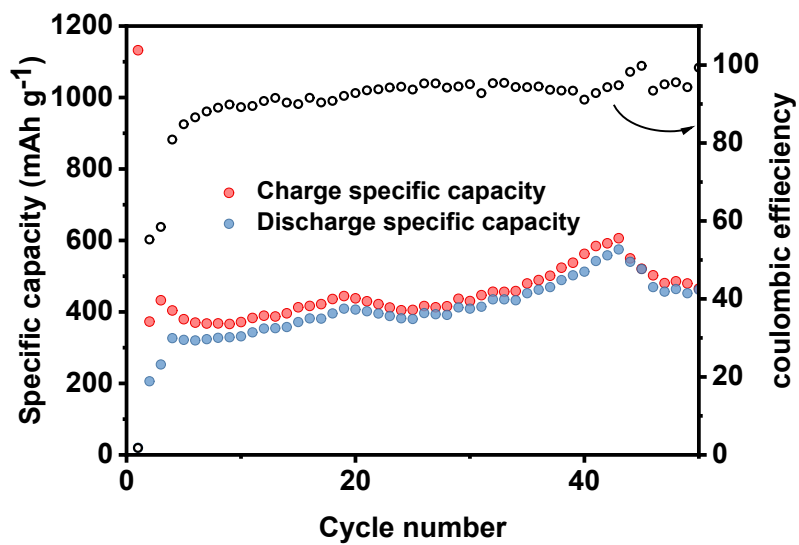

Figure S13. Cycling performance at 100 mA g<sup>-1</sup> for C@MnSe@GO-2.

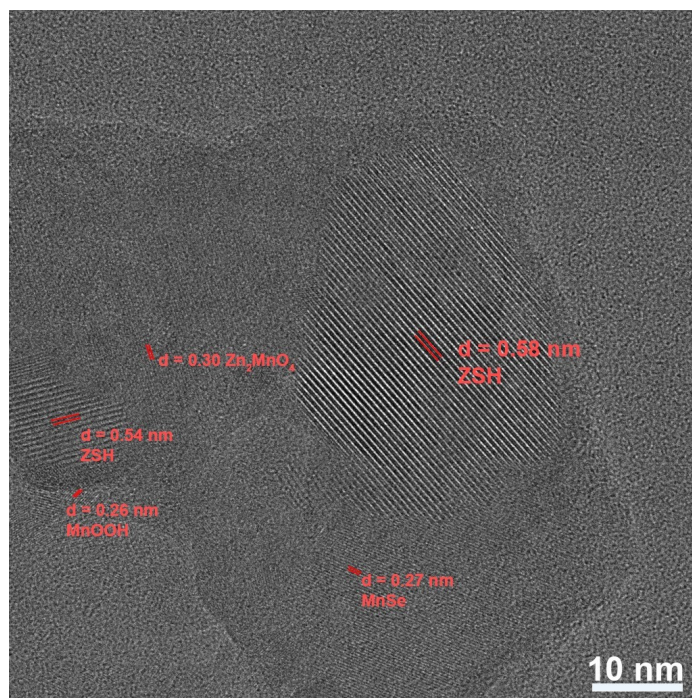

Figure S14. HRTEM images after Cycle test at 100 mA g<sup>-1</sup> for C@MnSe@GO-2.

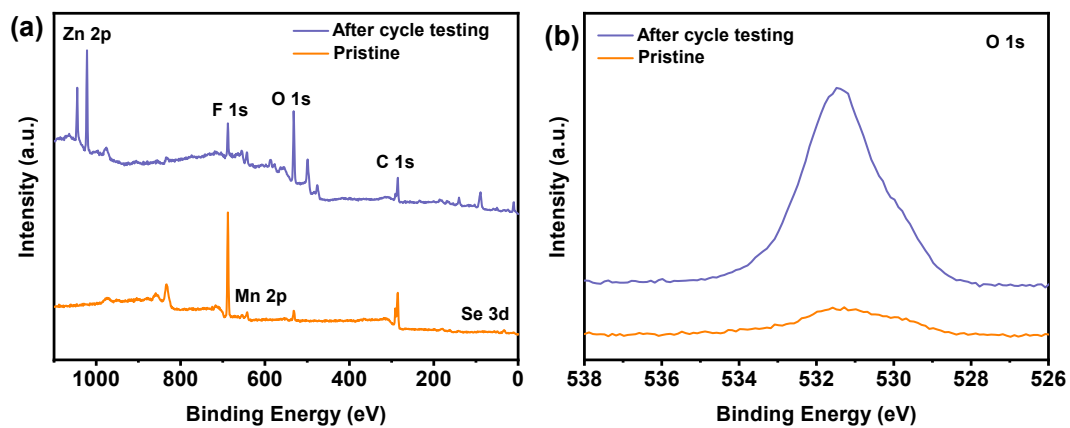

**Figure S15.** XPS images after Cycle test at  $100 \text{ mA g}^{-1}$  for  $\text{C@MnSe@GO-2}$ , (a) XPS survey, (b) O 1s.

**Table S3**  $R_s$  and  $R_{ct}$  values fitted from the corresponding EIS plots.

| Samples      | $R_s$ (ohm) | $R_{ct}$ (ohm) |
|--------------|-------------|----------------|
| Bulk $MnO_2$ | 3.14        | 623.24         |
| C@MnSe@GO-0  | 2.97        | 52.5           |
| C@MnSe@GO-2  | 2.58        | 32.2           |

**Table S4**  $b$  values fitted from the corresponding  $\log(i)$  versus  $\log(v)$  plots.

| Samples     | Anodic peak        | Cathodic peak 1    | Cathodic peak 2    |
|-------------|--------------------|--------------------|--------------------|
| C@MnSe@GO-0 | $y = 0.84x - 0.14$ | $y = 0.91x - 0.65$ | $y = 0.88x - 0.48$ |
| C@MnSe@GO-2 | $y = 0.94x + 0.11$ | $y = 0.72x - 0.54$ | $y = 0.91x - 0.20$ |

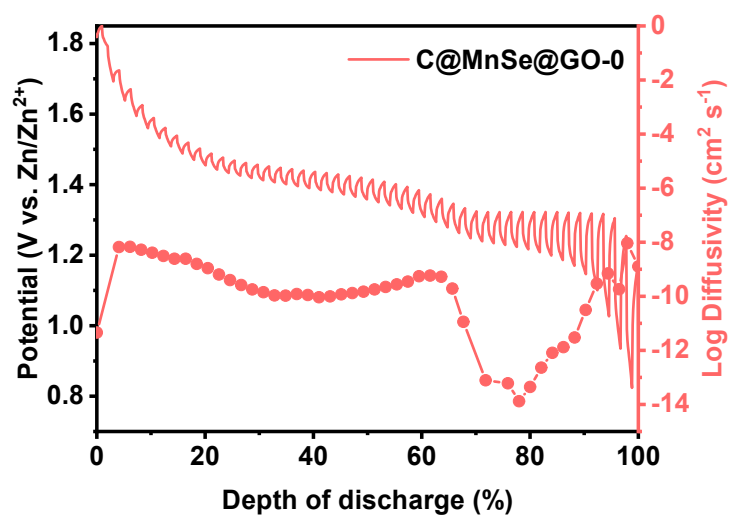

**Figure S16.** GITT and ionic diffusion coefficient curves during discharging for C@MnSe@GO-0.

**Table S5** Comparison of the Zn ion storage performance of C@MnSe@GO-2 and other recently reported similar Zn-ion battery cathodes.

| Materials                            | Voltage window (V) | Electrolyte                                          | Current density              | Specific capacity (mAh g <sup>-1</sup> ) | Current density               | Specific capacity (mAh g <sup>-1</sup> ) | Ref              |
|--------------------------------------|--------------------|------------------------------------------------------|------------------------------|------------------------------------------|-------------------------------|------------------------------------------|------------------|
| Se-in-Cu[Co(CN) <sub>6</sub> ]       | 0.1-2.1            | 4 m Zn(OTf) <sub>2</sub>                             | 200 mA g <sup>-1</sup>       | 664.7                                    | 10000 mA g <sup>-1</sup>      | 430.6                                    | 7                |
| MnS-EDO                              | 0.8-2.0            | 2M ZnSO <sub>4</sub> /0.1 M MnSO <sub>4</sub>        | 300 mA g <sup>-1</sup>       | 335.7                                    | 3000 mA g <sup>-1</sup>       | 104                                      | 8                |
| MnS <sub>0.5</sub> Se <sub>0.5</sub> | 0.8-1.85           | 2M ZnSO <sub>4</sub> /0.2 M MnSO <sub>4</sub>        | 100 mA g <sup>-1</sup>       | 272.8                                    | 2000 mA g <sup>-1</sup>       | 91.8                                     | 9                |
| VS <sub>2</sub>                      | 0.4-1.0            | 1M ZnSO <sub>4</sub>                                 | 100 mA g <sup>-1</sup>       | 187                                      | 2000 mA g <sup>-1</sup>       | 133                                      | 10               |
| MnS                                  | 0.8-2.0            | 2M ZnSO <sub>4</sub> /0.1 M MnSO <sub>4</sub>        | 90 mA g <sup>-1</sup>        | 297.7                                    | 3000 mA g <sup>-1</sup>       | 36.6                                     | 11               |
| MnSe@rGO                             | 0.8-1.85           | 2M ZnSO <sub>4</sub> /0.1 M MnSO <sub>4</sub>        | 0.1 C                        | 290                                      | 5 C                           | 178                                      | 12               |
| MnSe <sub>2</sub>                    | 0.8-1.85           | 2M ZnSO <sub>4</sub> /0.1 M MnSO <sub>4</sub>        | 100 mA g <sup>-1</sup>       | 452.4                                    | 2000 mA g <sup>-1</sup>       | 242.7                                    | 13               |
| MnSe-EO                              | 0.7-1.9            | 1M ZnSO <sub>4</sub> /0.1 M MnSO <sub>4</sub>        | 100 mA g <sup>-1</sup>       | 309                                      | 10000 mA g <sup>-1</sup>      | 125.9                                    | 14               |
| MoSSe/rGO                            | 0.3-1.3            | 2M Zn(CF <sub>3</sub> SO <sub>3</sub> ) <sub>2</sub> | 200 mA g <sup>-1</sup>       | 253.8                                    | 5000 mA g <sup>-1</sup>       | 124.2                                    | 15               |
| MnS/MnO@N-CF                         | 0.8-1.9            | 2M ZnSO <sub>4</sub> /0.1 M MnSO <sub>4</sub>        | 100 mA g <sup>-1</sup>       | 257.8                                    | 2000 mA g <sup>-1</sup>       | 128.7                                    | 16               |
| Layered VSe <sub>2</sub>             | 0-1.6              | 2M ZnSO <sub>4</sub>                                 | 200 mA g <sup>-1</sup>       | 250.6                                    | 5000 mA g <sup>-1</sup>       | 132.6                                    | 17               |
| rGO-VSe <sub>2</sub>                 | 0.2-1.4            | 2M ZnSO <sub>4</sub>                                 | 500 mA g <sup>-1</sup>       | 221.5                                    | 4000 mA g <sup>-1</sup>       | 161                                      | 18               |
| MnSe <sub>2</sub> /CNTs              | 0.8-2.0            | 2M ZnSO <sub>4</sub> /0.1 M MnSO <sub>4</sub>        | 100 mA g <sup>-1</sup>       | 451.1                                    | 3000 mA g <sup>-1</sup>       | 126.3                                    | 19               |
| VSe <sub>2-x</sub> -SS               | 0.4-1.6            | 3M Zn(CF <sub>3</sub> SO <sub>3</sub> ) <sub>2</sub> | 200 mA g <sup>-1</sup>       | 241.2                                    | 4000 mA g <sup>-1</sup>       | 230.1                                    | 20               |
| VSe <sub>2</sub>                     | 0.4-1.6            | 2M ZnSO <sub>4</sub>                                 | 100 mA g <sup>-1</sup>       | 131.8                                    | 2000 mA g <sup>-1</sup>       | 79.5                                     | 21               |
| <b>C@MnSe@GO-2</b>                   | <b>0.8-1.85</b>    | <b>2M ZnSO<sub>4</sub>/0.2 M MnSO<sub>4</sub></b>    | <b>100 mA g<sup>-1</sup></b> | <b>459.81</b>                            | <b>2000 mA g<sup>-1</sup></b> | <b>283.67</b>                            | <b>This work</b> |

## References

1. L. Xie, W. Xiao, X. Shi, J. Hong, J. Cai, K. Zhang, L. Shao and Z. Sun, *Chemical Communications*, 2022, **58**, 13807-13810.
2. Y. Zeng, Y. Wang, Q. Jin, Z. Pei, D. Luan, X. Zhang and X. W. D. Lou, *Angew Chem Int Ed Engl*, 2021, **60**, 25793-25798.
3. Y. Zhang, Z. Li, L. Gong, X. Wang, P. Hu and J. Liu, *Journal of Energy Chemistry*, 2023, **77**, 561-571.
4. P. Cai, K. Wang, J. Ning, X. He, M. Chen, Q. Li, H. Li, M. Zhou, W. Wang and K. Jiang, *Advanced Energy Materials*, 2022, **12**, 2202182.
5. W. Sun, F. Wang, S. Hou, C. Yang, X. Fan, Z. Ma, T. Gao, F. Han, R. Hu, M. Zhu and C. Wang, *J Am Chem Soc*, 2017, **139**, 9775-9778.
6. B. Wang, Y. Zeng, P. Chen, J. Hu, P. Gao, J. Xu, K. Guo and J. Liu, *ACS Applied Materials & Interfaces*, 2022, **14**, 36079-36091.
7. L. Ma, Y. Ying, S. Chen, Z. Chen, H. Li, H. Huang, L. Zhao and C. Zhi, *Advanced Energy Materials*, 2022, **12**, 2201322
8. X. Chen, W. L. a, Y. Xu, Z. Zeng, H. Tian, M. Velayutham, W. Shi, W. Li, C. Wang, D. Reed, V. V. Khramtsov, X. L. b and X. Liu, *Nano Energy*, 2020, **75**, 104869.
9. C. Guo, R. Zhou, X. Liu, R. Tang, W. Xi and Y. Zhu, *Small*, 2023, 2306237.
10. T. Jiao, Q. Yang, S. Wu, Z. Wang, D. Chen, D. Shen, B. Liu, J. Cheng, H. Li, L. Ma, C. Zhi and W. Zhang, *Journal of Materials Chemistry A*, 2019, **7**, 16330-16338.
11. S. Xu, S. Fan, W. Ma, J. Fan and G. Li, *Inorganic Chemistry Frontiers*, 2022, **9**, 1481-1489.
12. S. Wang, G. Zeng, Q. Sun, Y. Feng, X. Wang, X. Ma, J. Li, H. Zhang, J. Wen, J. Feng, L. Ci, A. Cabot and Y. Tian, *ACS Nano*, 2023, **17**, 13256-13268.
13. X. Li, J. Xie, G. Liu, J. Ding, B. Zhang, H. Zheng, L. Fan, Y. Tang and X. Ma, *Journal of Alloys and Compounds*, 2023, **937**, 168424.
14. A. Molaei Aghdam, S. Habibzadeh, M. Javanbakht, M. Ershadi and M. R. Ganjali, *ACS Applied Energy Materials*, 2023, **6**, 3225-3235.
15. H. Li, B. Chen, R. Gao, F. Xu, X. Wen, X. Zhong, C. Li, Z. Piao, N. Hu, X. Xiao, F. Shao, G. Zhou and J. Yang, *Nano Research*, 2023, **16**, 4933-4940.
16. F. Tang, X. Wu, Y. Shen, Y. Xiang, X. Wu, L. Xiong and X. Wu, *Energy Storage Materials*, 2022, **52**, 180-188.
17. L. Wang, Z. Wu, M. Jiang, J. Lu, Q. Huang, Y. Zhang, L. Fu, M. Wu and Y. Wu, *Journal of Materials Chemistry A*, 2020, **8**, 9313-9321.
18. M. Narayanasamy, L. Hu, B. Kirubasankar, Z. Liu, S. Angaiah and C. Yan, *Journal of Alloys and Compounds*, 2021, **882**, 160704.
19. J. Xie, G. Liu, X. Jiang, Z. Sui and S. Gao, *Ceramics International*, 2023, **49**, 10165-10171.
20. Y. Bai, H. Zhang, B. Xiang, X. Liang, J. Hao, C. Zhu and L. Yan, *ACS Appl Mater Interfaces*, 2021, **13**, 23230-23238.
21. Z. Wu, C. Lu, Y. Wang, L. Zhang, L. Jiang, W. Tian, C. Cai, Q. Gu, Z. Sun and L. Hu, *Small*, 2020, **16**, 2000698.
